# Supplementary material for: Narcissistic traits in young people and how experiencing shame relates to current attachment challenges
Source: Springer Nature journal article supplement (doi:10.1186/s12888-021-03249-4), 2021-05-11
Supplement: MOESM1 [file 19154674]

# Narcissistic traits in young people and how experiencing shame relates to current attachment challenges

Charlotte C. van Schie<sup>1</sup>, Heidi L. Jarman<sup>2</sup>, Samantha Reis<sup>1</sup>, Brin F. S. Grenyer<sup>1\*</sup>

<sup>1</sup>*Illawarra Health and Medical Research Institute and the School of Psychology, University of Wollongong, Wollongong, Australia*

*Address: Northfields Avenue, University of Wollongong, NSW 2522, Australia*

<sup>2</sup> *The Reflective Space: Clinical Psychology & Psychotherapy Services*

*Address: PO Box 778 Milsons Point, NSW 1565, Australia*

**\*Correspondence:**

*Brin Grenyer*

*E-mail address: [grenyer@uow.edu.au](mailto:grenyer@uow.edu.au)*

*Address: Northfields Avenue, University of Wollongong NSW 2522, Australia*

## Supplemental information

**Supplementary Table 1***Parameters estimates of direct, indirect and total effects of mediation model.*

Regressions:

| Outcome                       | Predictor             | Path | Parameter estimate | Standard error | z-value | p-value | 95% CI Lower limit | 95% CI Upper limit |
|-------------------------------|-----------------------|------|--------------------|----------------|---------|---------|--------------------|--------------------|
| Secure                        | Vulnerable narcissism | c1   | -0.433             | 0.074          | -5.861  | 0.000   | -0.579             | -0.288             |
|                               | Grandiose narcissism  | c5   | 0.236              | 0.062          | 3.788   | 0.000   | 0.119              | 0.364              |
| Dismissive                    | Vulnerable narcissism | c2   | -0.068             | 0.083          | -0.827  | 0.408   | -0.228             | 0.100              |
|                               | Grandiose narcissism  | c6   | 0.134              | 0.074          | 1.820   | 0.069   | -0.010             | 0.285              |
| Preoccupied                   | Vulnerable narcissism | c3   | 0.255              | 0.081          | 3.171   | 0.002   | 0.097              | 0.419              |
|                               | Grandiose narcissism  | c7   | 0.041              | 0.069          | 0.604   | 0.546   | -0.099             | 0.175              |
| Fearful                       | Vulnerable narcissism | c4   | 0.327              | 0.073          | 4.461   | 0.000   | 0.183              | 0.471              |
|                               | Grandiose narcissism  | c8   | -0.102             | 0.068          | -1.497  | 0.134   | -0.235             | 0.030              |
| Shame                         | Vulnerable narcissism | a1   | 0.565              | 0.065          | 8.706   | 0.000   | 0.434              | 0.692              |
|                               | Grandiose narcissism  | a2   | -0.066             | 0.068          | -0.969  | 0.332   | -0.195             | 0.066              |
| Secure                        | Shame                 | b1   | -0.150             | 0.064          | -2.335  | 0.020   | -0.273             | -0.029             |
| Dismissive                    | Shame                 | b2   | 0.004              | 0.076          | 0.051   | 0.959   | -0.151             | 0.152              |
| Preoccupied                   | Shame                 | b3   | 0.152              | 0.063          | 2.412   | 0.016   | 0.029              | 0.274              |
| Fearful                       | Shame                 | b4   | 0.195              | 0.061          | 3.217   | 0.001   | 0.079              | 0.318              |
| Indirect effect:              |                       | Path | Parameter estimate | Standard error | z-value | p-value | 95% CI Lower limit | 95% CI Upper limit |
| Vulnerable narcissism - Shame | Secure                | a1b1 | -0.085             | 0.037          | -2.287  | 0.022   | -0.155             | -0.017             |
| Vulnerable narcissism - Shame | Dismissive            | a1b2 | 0.002              | 0.043          | 0.051   | 0.959   | -0.088             | 0.085              |
| Vulnerable narcissism - Shame | Preoccupied           | a1b3 | 0.086              | 0.038          | 2.250   | 0.024   | 0.015              | 0.164              |
| Vulnerable narcissism - Shame | Fearful               | a1b4 | 0.110              | 0.038          | 2.927   | 0.003   | 0.042              | 0.191              |

|                               |                      |         | Parameter estimate | Standard error | z-value | p-value | 95% CI Lower limit | 95% CI Upper limit |
|-------------------------------|----------------------|---------|--------------------|----------------|---------|---------|--------------------|--------------------|
| Grandiose narcissism - Shame  | Secure               | a2b1    | 0.010              | 0.012          | 0.855   | 0.393   | -0.011             | 0.035              |
| Grandiose narcissism - Shame  | Dismissive           | a2b2    | 0.000              | 0.007          | -0.035  | 0.972   | -0.015             | 0.018              |
| Grandiose narcissism - Shame  | Preoccupied          | a2b3    | -0.010             | 0.012          | -0.837  | 0.403   | -0.038             | 0.010              |
| Grandiose narcissism - Shame  | Fearful              | a2b4    | -0.013             | 0.014          | -0.902  | 0.367   | -0.044             | 0.014              |
| Total effect:                 |                      |         |                    |                |         |         |                    |                    |
| Vulnerable narcissism - Shame | Secure               | c1+a1b1 | -0.517             | 0.064          | -8.055  | 0.000   | -0.643             | -0.390             |
| Vulnerable narcissism - Shame | Dismissive           | c2+a1b2 | -0.066             | 0.070          | -0.943  | 0.346   | -0.207             | 0.076              |
| Vulnerable narcissism - Shame | Preoccupied          | c3+a1b3 | 0.341              | 0.070          | 4.904   | 0.000   | 0.207              | 0.483              |
| Vulnerable narcissism - Shame | Fearful              | c4+a1b4 | 0.437              | 0.063          | 6.909   | 0.000   | 0.311              | 0.561              |
| Grandiose narcissism - Shame  | Secure               | c5+a2b1 | 0.246              | 0.064          | 3.849   | 0.000   | 0.124              | 0.375              |
| Grandiose narcissism - Shame  | Dismissive           | c6+a2b2 | 0.134              | 0.074          | 1.820   | 0.069   | -0.010             | 0.287              |
| Grandiose narcissism - Shame  | Preoccupied          | c7+a2b3 | 0.031              | 0.069          | 0.457   | 0.647   | -0.109             | 0.163              |
| Grandiose narcissism - Shame  | Fearful              | c8+a2b4 | -0.114             | 0.069          | -1.658  | 0.097   | -0.250             | 0.019              |
| Covariances:                  |                      |         |                    |                |         |         |                    |                    |
| Vulnerable narcissism         | Grandiose narcissism |         | 0.655              |                |         |         |                    |                    |
| Secure                        | Dismissive           |         | -0.039             | 0.054          | -0.716  | 0.474   | -0.144             | 0.069              |
| Secure                        | Preoccupied          |         | 0.078              | 0.046          | 1.695   | 0.090   | -0.011             | 0.171              |
| Secure                        | Fearful              |         | -0.316             | 0.050          | -6.345  | 0.000   | -0.410             | -0.214             |
| Dismissive                    | Preoccupied          |         | -0.134             | 0.054          | -2.490  | 0.013   | -0.238             | -0.029             |
| Dismissive                    | Fearful              |         | 0.164              | 0.053          | 3.109   | 0.002   | 0.062              | 0.268              |
| Preoccupied                   | Fearful              |         | 0.079              | 0.047          | 1.684   | 0.092   | -0.013             | 0.168              |

Note: Standardised variables are used in analyses therefore the parameter estimates are standardised parameters.

## Supplementary Table 2

*Parameters estimates of direct, indirect and total effects of mediation model by facets of pathological narcissism traits.*

Regressions:

| Outcome     | Predictor | Path       | Parameter estimate | Standard error | z-value       | p-value      | 95% CI Lower limit | 95% CI Upper limit |
|-------------|-----------|------------|--------------------|----------------|---------------|--------------|--------------------|--------------------|
| Secure      | CSE       | <b>c1</b>  | <b>-0.243</b>      | <b>0.092</b>   | <b>-2.630</b> | <b>0.009</b> | <b>-0.424</b>      | <b>-0.058</b>      |
|             | ENTR      | c2         | 0.057              | 0.082          | 0.702         | 0.483        | -0.098             | 0.225              |
|             | HS        | <b>c3</b>  | <b>-0.269</b>      | <b>0.065</b>   | <b>-4.124</b> | <b>0.000</b> | <b>-0.395</b>      | <b>-0.139</b>      |
|             | DEV       | c4         | -0.138             | 0.075          | -1.841        | 0.066        | -0.283             | 0.011              |
|             | GF        | c5         | 0.015              | 0.062          | 0.238         | 0.812        | -0.110             | 0.140              |
|             | EXP       | c6         | 0.060              | 0.056          | 1.066         | 0.286        | -0.051             | 0.172              |
|             | SSSE      | <b>c7</b>  | <b>0.237</b>       | <b>0.067</b>   | <b>3.553</b>  | <b>0.000</b> | <b>0.108</b>       | <b>0.372</b>       |
| Dismissive  | CSE       | <b>c8</b>  | <b>-0.521</b>      | <b>0.090</b>   | <b>-5.794</b> | <b>0.000</b> | <b>-0.690</b>      | <b>-0.335</b>      |
|             | ENTR      | c9         | 0.143              | 0.083          | 1.736         | 0.083        | -0.023             | 0.306              |
|             | HS        | <b>c10</b> | <b>0.261</b>       | <b>0.063</b>   | <b>4.152</b>  | <b>0.000</b> | <b>0.132</b>       | <b>0.380</b>       |
|             | DEV       | c11        | 0.086              | 0.071          | 1.224         | 0.221        | -0.050             | 0.224              |
|             | GF        | c12        | 0.091              | 0.065          | 1.400         | 0.161        | -0.037             | 0.216              |
|             | EXP       | c13        | 0.042              | 0.062          | 0.679         | 0.497        | -0.080             | 0.160              |
|             | SSSE      | c14        | -0.042             | 0.068          | -0.618        | 0.536        | -0.177             | 0.093              |
| Preoccupied | CSE       | <b>c15</b> | <b>0.303</b>       | <b>0.089</b>   | <b>3.395</b>  | <b>0.001</b> | <b>0.133</b>       | <b>0.483</b>       |
|             | ENTR      | c16        | 0.018              | 0.088          | 0.206         | 0.837        | -0.163             | 0.186              |
|             | HS        | c17        | -0.115             | 0.066          | -1.737        | 0.082        | -0.245             | 0.013              |
|             | DEV       | c18        | 0.055              | 0.082          | 0.678         | 0.498        | -0.103             | 0.216              |
|             | GF        | c19        | 0.027              | 0.072          | 0.380         | 0.704        | -0.117             | 0.168              |

|                  |             |             |                    |                |               |              |                    |                    |
|------------------|-------------|-------------|--------------------|----------------|---------------|--------------|--------------------|--------------------|
|                  | EXP         | c20         | 0.015              | 0.060          | 0.260         | 0.795        | -0.100             | 0.137              |
|                  | SSSE        | c21         | 0.052              | 0.073          | 0.717         | 0.473        | -0.086             | 0.197              |
| Fearful          | CSE         | c22         | 0.119              | 0.087          | 1.361         | 0.173        | -0.058             | 0.284              |
|                  | ENTR        | c23         | -0.140             | 0.081          | -1.720        | 0.086        | -0.300             | 0.023              |
|                  | HS          | <b>c24</b>  | <b>0.355</b>       | <b>0.053</b>   | <b>6.722</b>  | <b>0.000</b> | <b>0.249</b>       | <b>0.457</b>       |
|                  | DEV         | <b>c25</b>  | <b>0.143</b>       | <b>0.073</b>   | <b>1.959</b>  | <b>0.050</b> | <b>0.001</b>       | <b>0.287</b>       |
|                  | GF          | c26         | 0.015              | 0.063          | 0.247         | 0.805        | -0.106             | 0.141              |
|                  | EXP         | c27         | -0.019             | 0.056          | -0.338        | 0.735        | -0.127             | 0.091              |
|                  | SSSE        | <b>c28</b>  | <b>-0.144</b>      | <b>0.065</b>   | <b>-2.208</b> | <b>0.027</b> | <b>-0.273</b>      | <b>-0.017</b>      |
| Shame            | CSE         | <b>a1</b>   | <b>0.614</b>       | <b>0.072</b>   | <b>8.519</b>  | <b>0.000</b> | <b>0.472</b>       | <b>0.756</b>       |
|                  | ENTR        | a2          | -0.123             | 0.082          | -1.488        | 0.137        | -0.288             | 0.037              |
|                  | HS          | a3          | 0.076              | 0.062          | 1.214         | 0.225        | -0.044             | 0.200              |
|                  | DEV         | a4          | 0.055              | 0.064          | 0.849         | 0.396        | -0.072             | 0.179              |
|                  | GF          | a5          | 0.079              | 0.069          | 1.140         | 0.254        | -0.056             | 0.215              |
|                  | EXP         | a6          | -0.059             | 0.057          | -1.047        | 0.295        | -0.166             | 0.057              |
|                  | SSSE        | a7          | -0.060             | 0.060          | -0.998        | 0.318        | -0.177             | 0.059              |
| Secure           | Shame       | b1          | -0.114             | 0.068          | -1.672        | 0.095        | -0.249             | 0.019              |
| Dismissive       | Shame       | b2          | 0.137              | 0.077          | 1.773         | 0.076        | -0.020             | 0.281              |
| Preoccupied      | Shame       | b3          | 0.111              | 0.065          | 1.701         | 0.089        | -0.018             | 0.238              |
| Fearful          | Shame       | <b>b4</b>   | <b>0.179</b>       | <b>0.063</b>   | <b>2.833</b>  | <b>0.005</b> | <b>0.060</b>       | <b>0.310</b>       |
| Indirect effects |             | Path        | Parameter estimate | Standard error | z-value       | p-value      | 95% CI Lower limit | 95% CI Upper limit |
| CSE-Shame        | Secure      | a1b1        | -0.070             | 0.042          | -1.643        | 0.100        | -0.157             | 0.011              |
| CSE-Shame        | Dismissive  | a1b2        | 0.084              | 0.049          | 1.727         | 0.084        | -0.012             | 0.177              |
| CSE-Shame        | Preoccupied | a1b3        | 0.068              | 0.041          | 1.644         | 0.100        | -0.010             | 0.152              |
| CSE-Shame        | Fearful     | <b>a1b4</b> | <b>0.110</b>       | <b>0.041</b>   | <b>2.667</b>  | <b>0.008</b> | <b>0.035</b>       | <b>0.199</b>       |
| ENTR-Shame       | Secure      | a2b1        | 0.014              | 0.014          | 0.992         | 0.321        | -0.005             | 0.048              |
| ENTR-Shame       | Dismissive  | a2b2        | -0.017             | 0.016          | -1.036        | 0.300        | -0.055             | 0.007              |

|               |             | Path            | Parameter estimate | Standard error | z-value       | p-value      | 95% CI Lower limit | 95% CI Upper limit |
|---------------|-------------|-----------------|--------------------|----------------|---------------|--------------|--------------------|--------------------|
| ENTR-Shame    | Preoccupied | a2b3            | -0.014             | 0.013          | -1.028        | 0.304        | -0.045             | 0.005              |
| ENTR-Shame    | Fearful     | a2b4            | -0.022             | 0.018          | -1.239        | 0.215        | -0.064             | 0.006              |
| HS-Shame      | Secure      | a3b1            | -0.009             | 0.009          | -0.917        | 0.359        | -0.030             | 0.007              |
| HS-Shame      | Dismissive  | a3b2            | 0.010              | 0.011          | 0.923         | 0.356        | -0.007             | 0.037              |
| HS-Shame      | Preoccupied | a3b3            | 0.008              | 0.009          | 0.886         | 0.376        | -0.005             | 0.032              |
| HS-Shame      | Fearful     | a3b4            | 0.014              | 0.013          | 1.048         | 0.295        | -0.007             | 0.044              |
| DEV-Shame     | Secure      | a4b1            | -0.006             | 0.010          | -0.652        | 0.514        | -0.029             | 0.008              |
| DEV-Shame     | Dismissive  | a4b2            | 0.007              | 0.011          | 0.692         | 0.489        | -0.011             | 0.033              |
| DEV-Shame     | Preoccupied | a4b3            | 0.006              | 0.009          | 0.690         | 0.490        | -0.009             | 0.026              |
| DEV-Shame     | Fearful     | a4b4            | 0.010              | 0.013          | 0.760         | 0.447        | -0.013             | 0.040              |
| GF-Shame      | Secure      | a5b1            | -0.009             | 0.011          | -0.849        | 0.396        | -0.034             | 0.008              |
| GF-Shame      | Dismissive  | a5b2            | 0.011              | 0.013          | 0.842         | 0.400        | -0.009             | 0.042              |
| GF-Shame      | Preoccupied | a5b3            | 0.009              | 0.011          | 0.829         | 0.407        | -0.006             | 0.035              |
| GF-Shame      | Fearful     | a5b4            | 0.014              | 0.014          | 0.990         | 0.322        | -0.010             | 0.046              |
| EXP-Shame     | Secure      | a6b1            | 0.007              | 0.008          | 0.850         | 0.395        | -0.009             | 0.023              |
| EXP-Shame     | Dismissive  | a6b2            | -0.008             | 0.010          | -0.820        | 0.412        | -0.031             | 0.009              |
| EXP-Shame     | Preoccupied | a6b3            | -0.007             | 0.008          | -0.779        | 0.436        | -0.027             | 0.006              |
| EXP-Shame     | Fearful     | a6b4            | -0.011             | 0.011          | -0.935        | 0.350        | -0.035             | 0.010              |
| SSSE-Shame    | Secure      | a7b1            | 0.007              | 0.009          | 0.765         | 0.444        | -0.007             | 0.028              |
| SSSE-Shame    | Dismissive  | a7b2            | -0.008             | 0.010          | -0.788        | 0.431        | -0.033             | 0.009              |
| SSSE-Shame    | Preoccupied | a7b3            | -0.007             | 0.009          | -0.778        | 0.436        | -0.028             | 0.007              |
| SSSE-Shame    | Fearful     | a7b4            | -0.011             | 0.012          | -0.891        | 0.373        | -0.038             | 0.011              |
| Total effects |             |                 |                    |                |               |              |                    |                    |
| CSE-Shame     | Secure      | <b>c1+a1b1</b>  | <b>-0.313</b>      | <b>0.079</b>   | <b>-3.980</b> | <b>0.000</b> | <b>-0.467</b>      | <b>-0.161</b>      |
| CSE-Shame     | Dismissive  | <b>c8+a1b2</b>  | <b>-0.437</b>      | <b>0.075</b>   | <b>-5.839</b> | <b>0.000</b> | <b>-0.581</b>      | <b>-0.285</b>      |
| CSE-Shame     | Preoccupied | <b>c15+a1b3</b> | <b>0.371</b>       | <b>0.079</b>   | <b>4.692</b>  | <b>0.000</b> | <b>0.217</b>       | <b>0.529</b>       |
| CSE-Shame     | Fearful     | <b>c22+a1b4</b> | <b>0.229</b>       | <b>0.073</b>   | <b>3.113</b>  | <b>0.002</b> | <b>0.085</b>       | <b>0.371</b>       |

|            |             |                 |               |              |               |              |               |               |
|------------|-------------|-----------------|---------------|--------------|---------------|--------------|---------------|---------------|
| ENTR-Shame | Secure      | c2+a2b1         | 0.071         | 0.083        | 0.861         | 0.389        | -0.085        | 0.238         |
| ENTR-Shame | Dismissive  | c9+a2b2         | 0.127         | 0.082        | 1.542         | 0.123        | -0.038        | 0.287         |
| ENTR-Shame | Preoccupied | c16+a2b3        | 0.004         | 0.088        | 0.050         | 0.960        | -0.179        | 0.176         |
| ENTR-Shame | Fearful     | <b>c23+a2b4</b> | <b>-0.162</b> | <b>0.081</b> | <b>-1.992</b> | <b>0.046</b> | <b>-0.324</b> | <b>-0.002</b> |
| HS-Shame   | Secure      | <b>c3+a3b1</b>  | <b>-0.277</b> | <b>0.066</b> | <b>-4.170</b> | <b>0.000</b> | <b>-0.405</b> | <b>-0.143</b> |
| HS-Shame   | Dismissive  | <b>c10+a3b2</b> | <b>0.272</b>  | <b>0.062</b> | <b>4.372</b>  | <b>0.000</b> | <b>0.144</b>  | <b>0.388</b>  |
| HS-Shame   | Preoccupied | c17+a3b3        | -0.107        | 0.064        | -1.659        | 0.097        | -0.231        | 0.019         |
| HS-Shame   | Fearful     | <b>c24+a3b4</b> | <b>0.369</b>  | <b>0.053</b> | <b>6.905</b>  | <b>0.000</b> | <b>0.264</b>  | <b>0.473</b>  |
| DEV-Shame  | Secure      | c4+a4b1         | -0.144        | 0.075        | -1.917        | 0.055        | -0.292        | 0.005         |
| DEV-Shame  | Dismissive  | c11+a4b2        | 0.094         | 0.072        | 1.306         | 0.192        | -0.047        | 0.234         |
| DEV-Shame  | Preoccupied | c18+a4b3        | 0.061         | 0.081        | 0.758         | 0.448        | -0.095        | 0.219         |
| DEV-Shame  | Fearful     | <b>c25+a4b4</b> | <b>0.153</b>  | <b>0.073</b> | <b>2.106</b>  | <b>0.035</b> | <b>0.010</b>  | <b>0.295</b>  |
| GF-Shame   | Secure      | c5+a5b1         | 0.006         | 0.064        | 0.092         | 0.927        | -0.118        | 0.132         |
| GF-Shame   | Dismissive  | c12+a5b2        | 0.102         | 0.065        | 1.561         | 0.118        | -0.028        | 0.226         |
| GF-Shame   | Preoccupied | c19+a5b3        | 0.036         | 0.072        | 0.500         | 0.617        | -0.107        | 0.174         |
| GF-Shame   | Fearful     | c26+a5b4        | 0.030         | 0.064        | 0.465         | 0.642        | -0.092        | 0.156         |
| EXP-Shame  | Secure      | c6+a6b1         | 0.067         | 0.057        | 1.177         | 0.239        | -0.044        | 0.178         |
| EXP-Shame  | Dismissive  | c13+a6b2        | 0.034         | 0.063        | 0.543         | 0.587        | -0.088        | 0.156         |
| EXP-Shame  | Preoccupied | c20+a6b3        | 0.009         | 0.060        | 0.149         | 0.882        | -0.105        | 0.133         |
| EXP-Shame  | Fearful     | c27+a6b4        | -0.029        | 0.057        | -0.519        | 0.604        | -0.138        | 0.083         |
| SSSE-Shame | Secure      | <b>c7+a7b1</b>  | <b>0.244</b>  | <b>0.067</b> | <b>3.620</b>  | <b>0.000</b> | <b>0.113</b>  | <b>0.376</b>  |
| SSSE-Shame | Dismissive  | c14+a7b2        | -0.050        | 0.070        | -0.720        | 0.471        | -0.190        | 0.088         |
| SSSE-Shame | Preoccupied | c21+a7b3        | 0.046         | 0.073        | 0.624         | 0.533        | -0.094        | 0.191         |
| SSSE-Shame | Fearful     | <b>c28+a7b4</b> | <b>-0.154</b> | <b>0.065</b> | <b>-2.359</b> | <b>0.018</b> | <b>-0.284</b> | <b>-0.028</b> |

Note: Standardised variables are used in analyses therefore the parameter estimates are standardised parameters. Significant statistics are highlighted in bold. Covariances have been omitted from this table but can be found via Open Science Framework (see Declarations for link). CSE = Contingent self-esteem, ENTR = Entitlement Rage, HS = Hiding the self, DEV = Devaluing, GF = Grandiose Fantasies, EXP = Exploitativeness, SSSE = self-sacrificing self-enhancement.
